# Supplementary material
Source: PubMed Central journal article supplement (PMC5999318)
Supplement: NIHMS964050-supplement-Supplemental_material.pdf [file NIHMS964050-supplement-Supplemental_material.pdf]

**Figure S1**

**Seth *et al.***

**A**

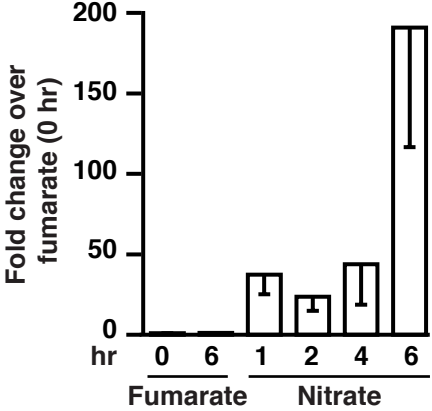

**B**

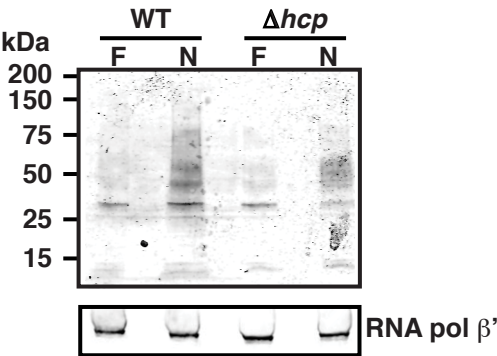

# Figure S2

Seth *et al.*

**A**

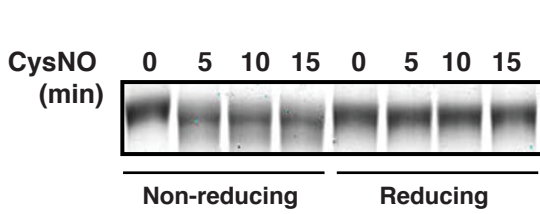

**B**

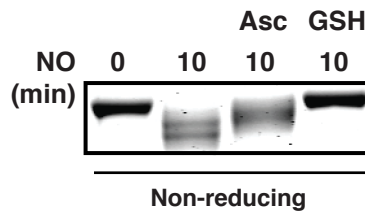

**C**

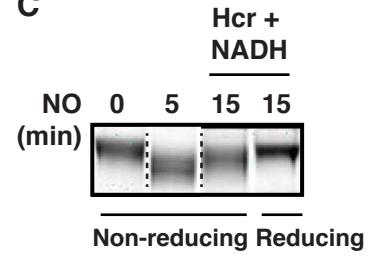

**D**

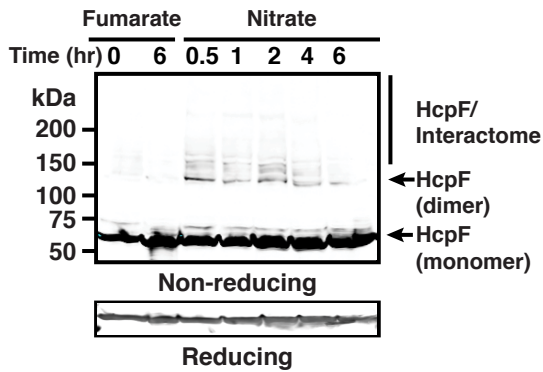

**E**

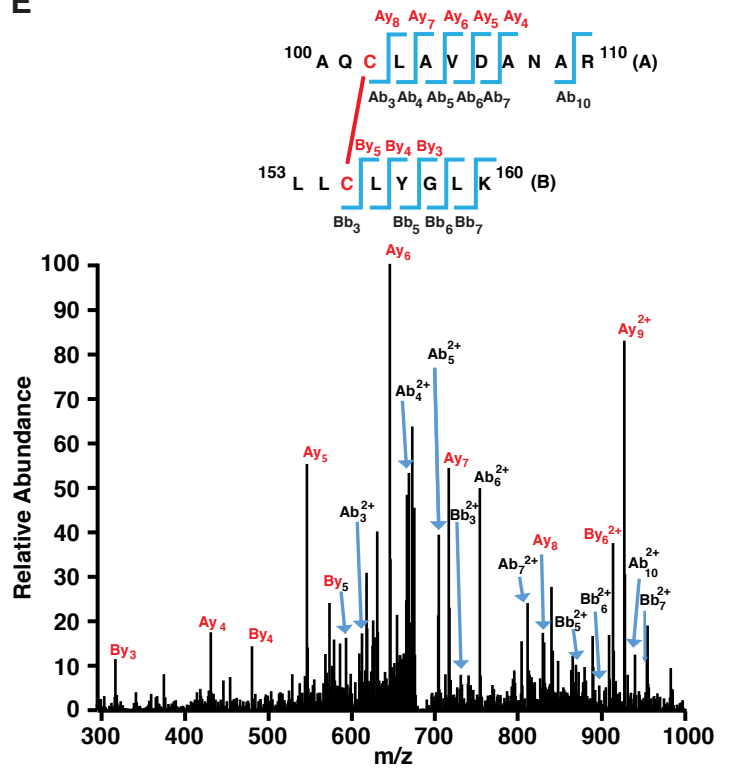

**F**

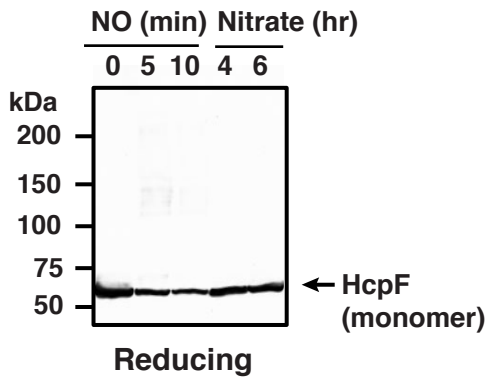

**G**

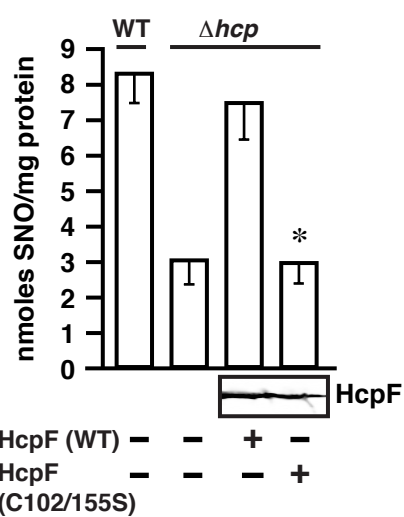

**Figure S3**  
**Seth *et al.***

**A**

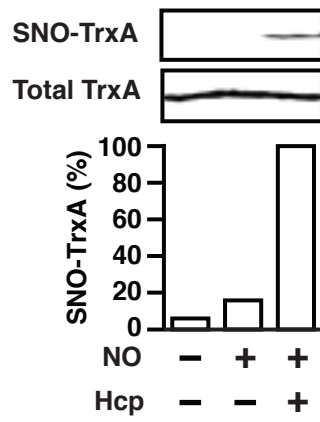

**B**

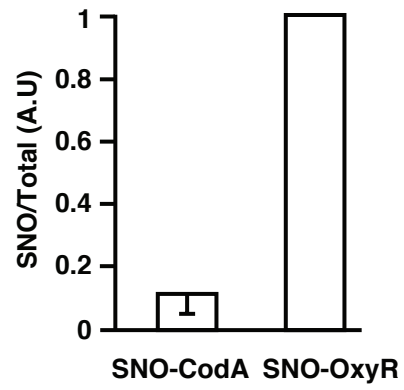

# Figure S4

Seth *et al.*

A

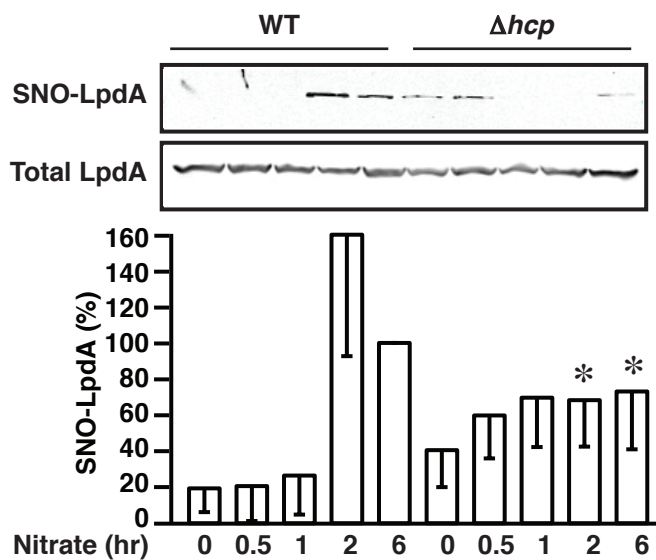

B

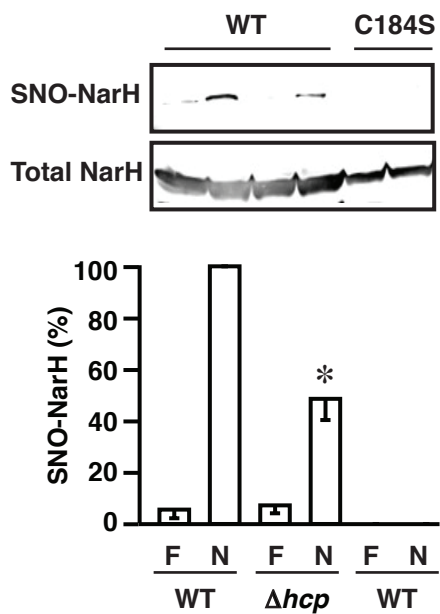

Figure S5  
Seth *et al.*

A

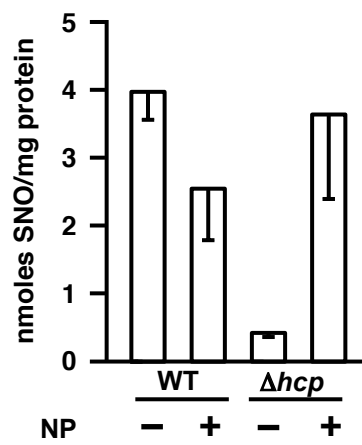

B

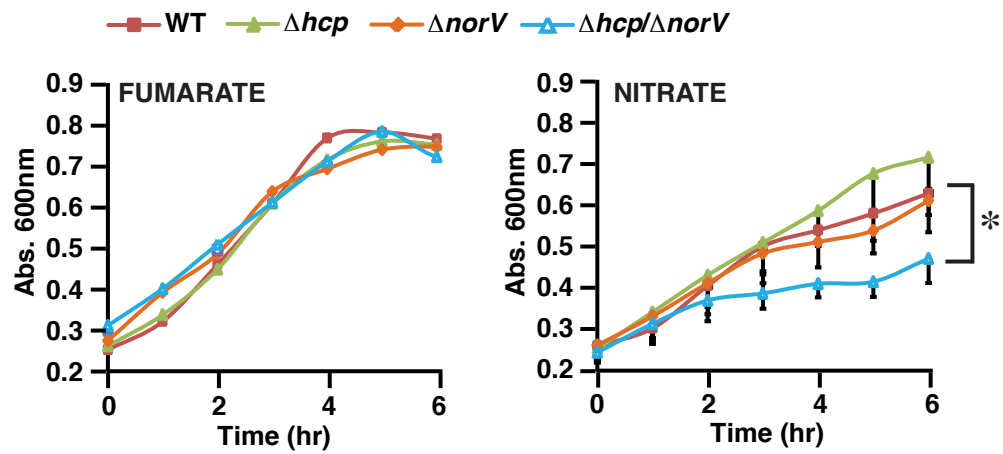

**Table S1. Nitrosylation, Growth and Nitrite Measurements in *E. coli* Strains Mutant for OxyR-dependent, Nitrate-induced Genes During ARN, Related to Figure 1**

| Strain      | Nitrosylation (nmoles/mg protein) | A600 | Nitrite (mM) | Strain      | Nitrosylation (nmoles/mg protein) | A600 | Nitrite (mM) |
|-------------|-----------------------------------|------|--------------|-------------|-----------------------------------|------|--------------|
| <i>hcp</i>  | 0.58                              | 0.98 | 6.10         | <i>kgtP</i> | 4.26                              | 0.82 | 6.08         |
| <i>ymgA</i> | 1.63                              | 1.23 | 6.37         | <i>gst</i>  | 4.31                              | 0.95 | 4.99         |
| <i>ymgC</i> | 2.11                              | 1.15 | 6.38         | <i>gcvP</i> | 4.35                              | 0.98 | 6.49         |
| <i>ybaY</i> | 2.20                              | 1.09 | 6.75         | <i>ynhG</i> | 4.39                              | 1.13 | 5.05         |
| <i>yeaC</i> | 2.26                              | 1.08 | 6.94         | <i>acnB</i> | 4.43                              | 0.79 | 4.23         |
| <i>lpd</i>  | 2.53                              | 0.83 | 7.59         | <i>fdnH</i> | 4.52                              | 1.07 | 5.43         |
| <i>yjcB</i> | 2.56                              | 0.99 | 6.30         | <i>yobA</i> | 4.54                              | 0.96 | 6.00         |
| <i>speD</i> | 2.59                              | 0.74 | 3.76         | <i>fdoG</i> | 4.58                              | 1.12 | 6.50         |
| <i>hslV</i> | 2.69                              | 0.95 | 5.40         | <i>nuoI</i> | 4.71                              | 0.94 | 5.15         |
| <i>tpx</i>  | 3.03                              | 1.29 | 6.54         | <i>ilvM</i> | 4.73                              | 1.07 | 6.16         |
| <i>yifK</i> | 3.15                              | 1.04 | 5.48         | <i>dadX</i> | 4.78                              | 0.81 | 8.27         |
| <i>yciW</i> | 3.19                              | 1.08 | 6.67         | <i>nrdD</i> | 4.89                              | 0.80 | 2.68         |
| <i>thiH</i> | 3.22                              | 0.40 | 0.62         | <i>napB</i> | 4.97                              | 1.00 | 6.00         |
| <i>metH</i> | 3.26                              | 0.90 | 5.89         | <i>sdhB</i> | 5.06                              | 1.14 | 6.34         |
| <i>glpF</i> | 3.28                              | 0.87 | 5.41         | <i>mdh</i>  | 5.08                              | 1.03 | 5.93         |
| <i>cbl</i>  | 3.33                              | 1.19 | 6.89         | <i>maeB</i> | 5.12                              | 0.93 | 5.51         |
| <i>psiE</i> | 3.35                              | 0.86 | 5.75         | WT          | 5.19                              | 0.88 | 6.11         |
| <i>tauA</i> | 3.40                              | 0.91 | 7.22         | <i>glpD</i> | 5.25                              | 0.93 | 5.46         |
| <i>ycgZ</i> | 3.41                              | 1.19 | 7.20         | <i>ylaC</i> | 5.42                              | 1.05 | 6.10         |
| <i>yfiM</i> | 3.47                              | 0.68 | 6.22         | <i>ydcN</i> | 5.53                              | 1.07 | 6.19         |
| <i>ybiJ</i> | 3.64                              | 0.88 | 3.06         | <i>acnA</i> | 5.63                              | 1.19 | 6.59         |
| <i>ilvG</i> | 3.70                              | 1.05 | 5.64         | <i>fdnI</i> | 5.89                              | 1.04 | 4.51         |
| <i>yqhA</i> | 3.73                              | 0.85 | 5.55         | <i>yhjE</i> | 5.94                              | 0.89 | 5.90         |
| <i>hslU</i> | 3.77                              | 0.81 | 5.14         | <i>ynaJ</i> | 6.10                              | 0.96 | 5.08         |
| <i>ssuE</i> | 3.77                              | 0.91 | 11.80        | <i>deaD</i> | 6.15                              | 1.14 | 6.28         |
| <i>proP</i> | 3.82                              | 0.99 | 5.41         | <i>osmB</i> | 6.23                              | 0.97 | 5.68         |
| <i>fdoI</i> | 3.87                              | 0.93 | 5.91         | <i>yeeE</i> | 6.27                              | 0.90 | 5.75         |
| <i>pdhR</i> | 3.91                              | 1.08 | 5.45         | <i>clpA</i> | 6.30                              | 0.76 | 6.12         |
| <i>cyoD</i> | 3.96                              | 1.07 | 6.91         | <i>cyoE</i> | 6.49                              | 0.96 | 5.30         |
| <i>gcd</i>  | 3.99                              | 1.32 | 7.64         | <i>intF</i> | 6.58                              | 1.13 | 6.45         |
| <i>aceA</i> | 4.00                              | 1.09 | 6.28         | <i>glpE</i> | 6.82                              | 1.14 | 6.74         |
| <i>yzgL</i> | 4.02                              | 1.15 | 6.54         | <i>tauB</i> | 6.86                              | 0.80 | 5.52         |
| <i>ybiC</i> | 4.03                              | 0.86 | 7.59         | <i>aceB</i> | 6.98                              | 0.99 | 5.33         |
| <i>yceI</i> | 4.05                              | 0.88 | 5.47         | <i>bhsA</i> | 7.18                              | 1.00 | 6.49         |
| <i>fdnG</i> | 4.07                              | 1.11 | 5.36         | <i>ylbA</i> | 7.49                              | 1.07 | 6.12         |
| <i>msrB</i> | 4.21                              | 0.87 | 5.92         | <i>fumA</i> | 7.55                              | 1.08 | 6.28         |
| <i>yebZ</i> | 4.24                              | 0.89 | 5.44         | <i>pgm</i>  | 8.81                              | 0.91 | 4.99         |

**Table S1.** *E. coli* cultures were started in minimal medium with fumarate and sub-cultured into medium with nitrate (10 mM) for 6 hrs. Nitrosylation was measured by photolysis/chemiluminescence. Growth and nitrite levels were measured at A600 and by Griess assay respectively (n=3 to 21).

**Table S2. Hcp-independent S-nitrosylation of Proteins During ARN, Related to Figure 3**

| <b>Protein</b>                                                     | <b>Uniprot</b> | <b>Fold change WT</b> | <b>Fold change <math>\Delta hcp</math></b> | <b>WT/<math>\Delta hcp</math></b> | <b>Interact with Hcp</b> |
|--------------------------------------------------------------------|----------------|-----------------------|--------------------------------------------|-----------------------------------|--------------------------|
| <b>KatG</b> Catalase-peroxidase                                    | P13029         | 2.2                   | 1.9                                        | 1.1                               | Y                        |
| <b>CysJ</b> Sulfite reductase [NADPH] flavoprotein alpha-component | P38038         | 3.2                   | 2.9                                        | 1.1                               |                          |
| <b>PurA</b> Adenylosuccinate synthetase                            | P0A7D4         | 2.0                   | 1.8                                        | 1.1                               | Y                        |
| <b>CarA</b> Carbamoyl-phosphate synthase small chain               | P0A6F1         | 3.2                   | 3.0                                        | 1.1                               |                          |
| <b>GltD</b> Glutamate synthase [NADPH] small chain                 | P09832         | 2.1                   | 2.0                                        | 1.1                               | Y                        |
| <b>InfB</b> Translation initiation factor IF-2                     | P0A705         | 1.9                   | 2.0                                        | 1.0                               |                          |
| <b>FabB</b> 3-oxoacyl-[acyl-carrier-protein] synthase 1            | P0A953         | 2.3                   | 2.4                                        | 1.0                               |                          |
| <b>HchA</b> Molecular chaperone Hsp31 and glyoxalase 3             | P31658         | 2.2                   | 2.5                                        | 0.9                               |                          |
| <b>FabZ</b> 3-hydroxyacyl-[acyl-carrier-protein] dehydratase       | P0A6Q6         | 4.6                   | 5.9                                        | 0.8                               |                          |
| <b>Hcp</b> Hydroxylamine reductase                                 | P75825         | 16.4                  |                                            |                                   |                          |

**Table S2.** Proteins that are S-nitrosylated during ARN in WT were identified as proteins that were pulled down by SNO-RAC  $\geq 1.5$  fold on nitrate versus fumarate. Proteins listed are S-nitrosylated comparably in WT and  $\Delta hcp$ . Proteins present in the Hcp interactome (Table S3) are identified with Y.

**Table S3. Nitrate-dependent Hcp Interactome, Related to Figure 3**

| <b>Protein</b>                                                          | <b>Uniprot</b> | <b>Protein</b>                                                            | <b>Uniprot</b> |
|-------------------------------------------------------------------------|----------------|---------------------------------------------------------------------------|----------------|
| <b>NarG</b> Respiratory nitrate reductase 1 alpha chain                 | <b>P09152</b>  | <b>MetE</b> 5-methyltetrahydropteroyltryglutamate                         | <b>P25665</b>  |
| <b>IlvB</b> Acetolactate synthase isozyme 1 large subunit               | P08142         | <b>GltD</b> Glutamate synthase [NADPH] small chain                        | P09832         |
| <b>MiaB</b> tRNA-2-methylthio-N(6)-dimethylallyl-adenosine synthase     | P0AE11         | <b>MetA</b> Homoserine O-succinyltransferase                              | P07623         |
| <b>OmpA</b> Outer membrane protein A                                    | P0A910         | <b>Gcp</b> tRNA N6-adenosine threonylcarbamoyltransferase                 | P05852         |
| <b>AccD</b> Acetyl-coenzyme A carboxylase carboxyl transferase          | P0A9Q5         | <b>YcfP</b> UPF0227 protein                                               | P0A8E1         |
| <b>LpdA</b> Dihydrolipoyl dehydrogenase                                 | <b>P0A9P0</b>  | <b>DeaD</b> ATP-dependent RNA helicase                                    | P0A9P6         |
| <b>AsnB</b> Asparagine synthetase B                                     | P22106         | <b>AccA</b> Acetyl-coenzyme A carboxylase carboxyl transferase            | P0ABD5         |
| <b>EttA</b> Energy-dependent translational throttle protein             | P0A9W3         | <b>DnaB</b> Replicative DNA helicase                                      | P0ACB0         |
| <b>RplN</b> 50S ribosomal protein L14                                   | P0ADY3         | <b>PurA</b> Adenylosuccinate synthetase                                   | P0A7D4         |
| <b>PyrG</b> CTP synthase                                                | <b>P0A7E5</b>  | <b>IspG</b> 4-hydroxy-3-methylbut-2-en-1-yl diphosphate synthase          | P62620         |
| <b>IlvI</b> Acetolactate synthase isozyme 3 large subunit               | P00893         | <b>Hcr</b> NADH oxidoreductase                                            | <b>P75824</b>  |
| <b>NirB</b> Nitrite reductase (NADH) large subunit                      | <b>P08201</b>  | <b>AroG</b> Phospho-2-dehydro-3-deoxyheptonate aldolase                   | P0AB91         |
| <b>GapA</b> Glyceraldehyde-3-phosphate dehydrogenase A                  | <b>P0A9B2</b>  | <b>GyrB</b> DNA gyrase subunit B                                          | P0AES6         |
| <b>SurA</b> Chaperone                                                   | P0ABZ6         | <b>DnaK</b> Chaperone protein                                             | <b>P0A6Y8</b>  |
| <b>SecD</b> Protein translocase subunit                                 | P0AG90         | <b>AceF</b> Dihydrolipoyllysine-residue acetyltransferase (PyrDH complex) | P06959         |
| <b>MetL</b> Bifunctional aspartokinase/homoserine                       | P00562         | <b>RpoA</b> DNA-directed RNA polymerase subunit alpha                     | P0A7Z4         |
| <b>AceE</b> Pyruvate dehydrogenase E1 component                         | <b>P0AFG8</b>  | <b>CysC</b> Adenylyl-sulfate kinase                                       | P0A6J1         |
| <b>IlvA</b> L-threonine dehydratase biosynthetic                        | P04968         | <b>AroF</b> Phospho-2-dehydro-3-deoxyheptonate aldolase                   | P00888         |
| <b>MurC</b> UDP-N-acetylmuramate--L-alanine ligase                      | P17952         | <b>AccC</b> Biotin carboxylase                                            | P24182         |
| <b>OppF</b> Oligopeptide transport ATP-binding protein                  | P77737         | <b>MreB</b> Rod shape-determining protein                                 | P0A9X4         |
| <b>RpsG</b> 30S ribosomal protein S7                                    | P02359         | <b>MetF</b> 5,10-methylenetetrahydrofolate reductase                      | P0AEZ1         |
| <b>RplE</b> 50S ribosomal protein L5                                    | P62399         | <b>Pur7</b> Phosphoribosylaminoimidazole-succinocarboxamide synthase      | P0A7D7         |
| <b>GpmI</b> 2,3-bisphosphoglycerate-independent phosphoglycerate mutase | P37689         | <b>ArgB</b> Acetylglutamate kinase                                        | P0A6C8         |
| <b>CysH</b> Phosphoadenosine phosphosulfate reductase                   | P17854         | <b>ClpX</b> ATP-dependent Clp protease ATP-binding subunit                | P0A6H1         |
| <b>Upp</b> Uracil phosphoribosyltransferase                             | P0A8F0         | <b>LeuC</b> 3-isopropylmalate dehydratase large subunit                   | <b>P0A6A6</b>  |
| <b>FtsZ</b> Cell division protein                                       | P0A9A6         | <b>EF-Tu1</b> Elongation factor Tu 1                                      | <b>P0CE47</b>  |
| <b>OmpR</b> Transcriptional regulatory protein                          | P0AA16         | <b>TtcA</b> tRNA 2-thiocytidine biosynthesis protein                      | P76055         |
| <b>MinD</b> Septum site-determining protein                             | P0AEZ3         | <b>ObgE</b> GTPase CgtA                                                   | P42641         |



|                                                                              |               |                                                                           |               |
|------------------------------------------------------------------------------|---------------|---------------------------------------------------------------------------|---------------|
| <b>NusG</b> Transcription termination/antitermination protein                | P0AFG0        | <b>LysC</b> Lysine-sensitive aspartokinase 3                              | P08660        |
| <b>Rho</b> Transcription termination factor                                  | <b>P0AG30</b> | <b>IivC</b> Ketol-acid reductoisomerase                                   | P05793        |
| <b>RplF</b> 50S ribosomal protein L6                                         | P0AG55        | <b>Tpx</b> Thiol peroxidase                                               | P0A862        |
| <b>RecA</b> Protein RecA                                                     | P0A7G6        | <b>NarL</b> Nitrate/nitrite response regulator protein                    | P0AF28        |
| <b>RplJ</b> 50S ribosomal protein L10                                        | P0A7J3        | <b>NarH</b> Respiratory nitrate reductase 1 beta chain                    | <b>P11349</b> |
| <b>RpsE</b> 30S ribosomal protein S5                                         | P0A7W1        | <b>IivH</b> Acetolactate synthase isozyme 3 small subunit                 | P00894        |
| <b>RpsB</b> 30S ribosomal protein S2                                         | P0A7V0        | <b>OmpF</b> Outer membrane protein F                                      | P02931        |
| <b>RpsC</b> 30S ribosomal protein S3                                         | P0A7V3        | <b>DnaJ</b> Chaperone protein                                             | P08622        |
| <b>RpsK</b> 30S ribosomal protein S11                                        | P0A7R9        | <b>LeuA</b> L-isopropylmalate synthase                                    | P09151        |
| <b>ArgG</b> Argininosuccinate synthase                                       | P0A6E4        | <b>ArgA</b> Amino-acid acetyltransferase                                  | P0A6C5        |
| <b>Tsf</b> Elongation factor Ts                                              | P0A6P1        | <b>HslU</b> ATP-dependent protease ATPase subunit                         | P0A6H5        |
| <b>HisD</b> Histidinol dehydrogenase                                         | P06988        | <b>PyrI</b> Aspartate carbamoyltransferase regulatory chain               | P0A7F3        |
| <b>RplM</b> 50S ribosomal protein L13                                        | P0AA10        | <b>RplK</b> 50S ribosomal protein L11                                     | P0A7J7        |
| <b>PyrB</b> Aspartate carbamoyltransferase catalytic chain                   | P0A786        | <b>RplS</b> 50S ribosomal protein L19                                     | P0A7K6        |
| <b>GlyQ</b> Glycine--tRNA ligase alpha subunit                               | P00960        | <b>RplI</b> 50S ribosomal protein L9                                      | P0A7R1        |
| <b>GatY</b> D-tagatose-1,6-bisphosphate aldolase subunit                     | P0C8J6        | <b>RpsJ</b> 30S ribosomal protein S10                                     | P0A7R5        |
| <b>TrpG</b> Bifunctional protein                                             | P00904        | <b>RpsD</b> 30S ribosomal protein S4                                      | P0A7V8        |
| <b>GuaA</b> GMP synthase [glutamine-hydrolyzing]                             | <b>P04079</b> | <b>Tig</b> Trigger factor                                                 | P0A850        |
| <b>TyrR</b> Transcriptional regulatory protein                               | P07604        | <b>PflA</b> Pyruvate formate-lyase 1-activating enzyme                    | P0A9N4        |
| <b>RplT</b> 50S ribosomal protein L20                                        | P0A7L3        | <b>ArcA</b> Aerobic respiration control protein                           | P0A9Q1        |
| <b>HflK</b> Modulator of FtsH protease                                       | P0ABC7        | <b>FdnH</b> Formate dehydrogenase, nitrate-inducible, iron-sulfur subunit | <b>P0AAJ3</b> |
| <b>SucB</b> Dihydrodipolyllysine-residue succinyltransferase component of 2- | P0AFG6        | <b>FabG</b> 3-oxoacyl-[acyl-carrier-protein] reductase                    | P0AEK2        |
| <b>IbpB</b> Small heat shock protein                                         | P0C058        | <b>NtrC</b> Nitrogen regulation protein NR(I)                             | P0AFB8        |
| <b>FdnG</b> Formate dehydrogenase, nitrate-inducible, major subunit          | <b>P24183</b> | <b>SecY</b> Protein translocase subunit                                   | P0AGA2        |
| <b>RplB</b> 50S ribosomal protein L2                                         | P60422        | <b>CysA</b> Sulfate/thiosulfate import ATP-binding protein                | P16676        |
| <b>Aas</b> Bifunctional protein                                              | P31119        | <b>ThiE</b> Thiamine-phosphate synthase                                   | P30137        |
| <b>AcnB</b> Aconitate hydratase 2                                            | <b>P36683</b> | <b>RavA</b> ATPase                                                        | P31473        |
| <b>KatG</b> Catalase-peroxidase                                              | P13029        | <b>RplD</b> 50S ribosomal protein L4                                      | P60723        |
|                                                                              |               | <b>YdgH</b> Protein YdgH                                                  | P76177        |

**Table S3.** The Hcp interactome was identified following ARN for 1 hr (n=3) or 6 hr (n=3) using the criteria described in Materials and Methods. Proteins listed were identified at least twice at either of the two time points. Proteins that are also S-nitrosylated in an Hcp-dependent manner are indicated in red.

**Table S4. NO-dependent Hcp Interactome, Related to Figure 3**

| Protein                                                                                               | Uniprot | Nitrate interactome |
|-------------------------------------------------------------------------------------------------------|---------|---------------------|
| <b>OppD</b> Oligopeptide transport ATP-binding protein                                                | P76027  |                     |
| <b>YdiJ</b> Uncharacterized protein                                                                   | P77748  |                     |
| <b>IspG</b> 4-hydroxy-3-methylbut-2-en-1-yl diphosphate synthase                                      | P62620  | Y                   |
| <b>MetG</b> Methionyl-tRNA synthetase                                                                 | P00959  |                     |
| <b>GltD</b> Glutamate synthase [NADPH] small chain                                                    | P09832  | Y                   |
| <b>GltB</b> Glutamate synthase [NADPH] large chain                                                    | P09831  |                     |
| <b>FdhF</b> Formate dehydrogenase H                                                                   | P07658  |                     |
| <b>CysI</b> Sulfite reductase [NADPH] hemoprotein beta-component                                      | P17846  |                     |
| <b>AceE</b> Pyruvate dehydrogenase E1 component                                                       | P0AFG8  | Y                   |
| <b>Aas</b> Bifunctional protein                                                                       | P31119  | Y                   |
| <b>NuoC</b> NADH-quinone oxidoreductase subunit C/D                                                   | P33599  |                     |
| <b>KatG</b> Catalase-peroxidase                                                                       | P13029  | Y                   |
| <b>MetE</b> 5-methyltetrahydropteroyltriglutamate--homocysteine methyltransferase                     | P25665  | Y                   |
| <b>CysN</b> Sulfate adenylyltransferase subunit 1                                                     | P23845  |                     |
| <b>AccA</b> Acetyl-coenzyme A carboxylase carboxyl transferase subunit alpha                          | P0ABD5  | Y                   |
| <b>MiaB</b> tRNA-2-methylthio-N(6)-dimethylallyl-adenosine synthase                                   | P0AEI1  | Y                   |
| <b>OppF</b> Oligopeptide transport ATP-binding protein                                                | P77737  | Y                   |
| <b>TrpG</b> Bifunctional protein                                                                      | P00904  | Y                   |
| <b>MetH</b> Methionine synthase                                                                       | P13009  |                     |
| <b>AccD</b> Acetyl-coenzyme A carboxylase carboxyl transferase subunit beta                           | P0A9Q5  | Y                   |
| <b>MbhL</b> Hydrogenase-1 large chain                                                                 | P0ACD8  |                     |
| <b>UspA</b> Universal stress protein A                                                                | P0AED0  |                     |
| <b>ProB</b> Glutamate 5-kinase                                                                        | P0A7B5  |                     |
| <b>LeuC</b> 3-isopropylmalate dehydratase large subunit                                               | P0A6A6  | Y                   |
| <b>GatY</b> D-tagatose-1,6-bisphosphate aldolase subunit                                              | P0C8J6  | Y                   |
| <b>NuoG</b> NADH-quinone oxidoreductase subunit G                                                     | P33602  |                     |
| <b>AceF</b> Dihydrolipoyllysine-residue acetyltransferase component of pyruvate dehydrogenase complex | P06959  | Y                   |
| <b>IivC</b> Ketol-acid reductoisomerase                                                               | P05793  | Y                   |
| <b>LpdA</b> Dihydrolipoyl dehydrogenase                                                               | P0A9P0  | Y                   |
| <b>SucA</b> 2-oxoglutarate dehydrogenase E1 component                                                 | P0AFG3  |                     |

**Table S4.** The Hcp interactome was identified following treatment with DEANO (100  $\mu$ M, 10 min.) using the criteria described in Materials and Methods. Proteins listed were identified in at least 2 independent experiments. Proteins present in the nitrate-dependent Hcp interactome (Table S3) are identified with Y.

**Table S5. Primers Used for Cloning and QPCR, Related to STAR Methods**

| <b>Primer name</b> | <b>Primer sequence</b>                                    |
|--------------------|-----------------------------------------------------------|
| Hcp-pUC19-F        | ATTAGGATCCTTTAAGAAGGAGATATACATATGTTTTGTGTGCAATG           |
| Hcp-pUC19-R        | CGATCAAGCTTTTACTTGTTCATCGTCGTCCTTGTAGTCCGCGCTCAACAGTTGC   |
| OxyR-pUC19-F       | ATTAGGATCCCTTTAAGAAGGAGATATACATATGAATATTCG                |
| OxyR-pUC19-R       | GCATAAGCTTTTACTTGTTCATCGTCGTCCTTGTAGTCAACCGCCTGTTTTAAAAC  |
| LpdA-pUC19-F       | ATTAGGATCCTTTAAGAAGGAGATATACATATGAGTACTGAAATCAAAACTC      |
| LpdA-pUC19-R       | CGATCAAGCTTTTACTTGTTCATCGTCGTCCTTGTAGTCCCTTCTTCTTCGCTTTCG |
| Hcp-pET21b-F       | ATATACATATGTTTTGTGTGCAATGTGAACAAAC                        |
| Hcp-pET21b-R       | TAATAAGCTTCGCGCTCAACAGTTGCTTCATG                          |
| Hcr-pET21b-F       | ATATACATATGACGATGCCAACGAATC                               |
| Hcr-pET21b-R       | ATTGCAAGCTTTGCGGAGAACCAAATCC                              |
| OxyR-pET21b-F      | ACTATCATATGAATATTCGTGATCTTG                               |
| OxyR-pET21b-R      | TGAATCTCGAGAACCGCCTGTTTTAAAACCTTATCG                      |
| LpdA-pET21b-F      | ATCATAACATATGAGTACTGAAATCAAAACTCAGG                       |
| LpdA-pET21b-R      | GACTGAAAGCTTCTTCTTCTTCGCTTTCGGGTTTCGG                     |
| GapA-pET21b-F      | ATCATAACATATGACTATCAAAGTAGGTATCAACG                       |
| GapA-pET21b-R      | GACTGAAAGCTTTTTGGAGATGTGAGCGATCAGG                        |
| CodA-pET21b-F      | ATCATAGCTAGCGTGTGCAATA ACGCTTTACA AACAATTATT AACG         |
| CodA-pET21b-R      | GACTGAAAGCTTACGTTTGTAATCGATGGCTTCTGG                      |
| NapA-pET21b-F      | ATCATAGCTAGCATGAAACTCA GTCGTCGTAG CTTTATGAAA GC           |
| NapA-pET21b-R      | GACTGAAAGCTTCACCTTCTCCAGTTTGACCGCGC                       |
| hcp-F (QPCR)       | TGACCTTCAGGATTTACTCATCGCGG                                |
| hcp-R (QPCR)       | GATGATGCCGTATTCACGCGCTTT                                  |

## SUPPLEMENTAL FIGURE LEGENDS

### **Figure S1. Induction of *hcp* and Comparison of SNO-proteins Between WT and $\Delta hcp$ During ARN, Related to Figure 1 and Figure 3**

(A) Cells were grown anaerobically on nitrate or fumarate prior to RNA extraction and QPCR. Fold-expression of *hcp* on nitrate was calculated relative to expression on fumarate using the comparative  $C_t$  method. Expression in each sample was normalized to that of 16s rRNA (n=3,  $\pm$ SEM).

(B) *E. coli* were grown anaerobically in minimal media containing either fumarate or nitrate (10 mM) for 6 hr and lysates were subjected to SNO-RAC followed by SDS-PAGE and Coomassie staining. Representative gel, n=4.

### **Figure S2. SNO-dependent Intramolecular Disulfide Formation in Hcp *In Vitro* and *In Vivo*, Related to Figure 3**

(A) Hcp (1.8  $\mu$ M) was treated anaerobically with CysNO (200  $\mu$ M), followed by SDS-PAGE and Coomassie staining. As for exposure to NO (Figure 3B), exposure to the S-nitrosylating agent CysNO resulted in a decrease in  $m_r$  in non-reduced samples, indicative of disulfide formation, which was reversed by reduction. Representative gel, n=2.

(B) The decrease in  $m_r$  of Hcp induced by anaerobic treatment with NO (DEANO, 200  $\mu$ M, 10 min) was diminished when ascorbate (Asc) was included in the reaction mixture as a selective reductant of SNO, and was eliminated when glutathione (GSH) was included as a reductant of SNO and disulfide. Representative gel, n=2.

(C) Hcp was treated anaerobically with DEANO for 5 min, and Hcr (1.8  $\mu$ M) and NADH (100  $\mu$ M) were added to an aliquot for an additional 10 min. The NO-induced decrease in  $m_r$  is substantially diminished by Hcr+NADH, consistent with Hcr-catalyzed disulfide reduction

with NADH as co-factor. Representative gel, n=3. Dashed lines indicate in-gel cuts for clarity.

(D) Hcp dimerization and interactome formation *in vivo* occur rapidly during ARN. WT/HcpF were grown in the presence of either nitrate or fumarate (10 mM). Lysates were analyzed by SDS-PAGE. Hcp was visualized by Western blotting with anti-FLAG antibody. Representative gel, n=2.

(E) MS/MS (LC-MS/MS) spectra of the disulfide bond formed between Cys102-Cys155 in Hcp during ARN. A representative annotated MS/MS fragmentation spectrum is shown illustrating the Cys102- and Cys155-containing peptides (labeled as A and B respectively) with disulfide bond between Cys102-155. Peptide sequences are shown at the top of the spectrum, with the annotation of the identified matched amino-terminus containing ions (*b* ions) in black and the carboxyl terminus ions (*y* ions) in red. For clarity, only major identified peaks are labeled.

(F) Dimerization and interactome formation by Hcp is abrogated under reducing conditions. As in Figure 3C, WT *E. coli* overexpressing FLAG-tagged Hcp (WT/HcpF) were grown anaerobically either in nitrate (10 mM, 6 hr), or in fumarate followed by treatment with DEANO (100  $\mu$ M). Lysates were analyzed by reducing SDS-PAGE and Hcp was visualized by Western blotting with anti-FLAG antibody. Representative gel, n=3.

(G) WT,  $\Delta hcp$ ,  $\Delta hcp$ /HcpF,  $\Delta hcp$  /HcpF C102/155S were grown anaerobically in LB medium in the presence of nitrate (10 mM, 2.5 hrs) and SNO levels were measured by Hg<sup>2+</sup>-coupled photolysis/chemiluminescence (n=5,  $\pm$ SEM). \* differs from  $\Delta hcp$ /HcpF, p < 0.05.

**Figure S3. Trans-nitrosylases Propagate Hcp-dependent S-nitrosylation, Related to Figure 4**

(A) TrxA (4.8  $\mu$ M) was treated with DEANO (50  $\mu$ M) in the presence or absence of Hcp (1.2  $\mu$ M) as indicated for 15 min at room temperature under anaerobic conditions. The reactions were subjected to SNO-RAC and TrxA was visualized by Western blotting using anti-thioredoxin antibody (n=2).

(B) CodA (1.6  $\mu$ M) or OxyR (1.6  $\mu$ M) was treated with DEANO (50  $\mu$ M) and Hcp (200 nM) anaerobically *in vitro*. S-nitrosylation of CodA and OxyR was assessed by SNO-RAC followed by western blotting and densitometry. The yield of SNO-protein (SNO-protein/total) was calculated and data are presented re SNO-OxyR (n=3,  $\pm$ SEM).

**Figure S4. S-nitrosylation of LpdA and NarH During ARN is Decreased in the Absence of Hcp, Related to Figure 5**

(A) WT/LpdA-FLAG and  $\Delta hcp$ /LpdA-FLAG cells were grown anaerobically on 10 mM nitrate. Lysates were analyzed by SNO-RAC (n= 3,  $\pm$  SEM). \* differs from 2 hrs WT/LpdA-FLAG by ANOVA with Dunnett's test,  $p < 0.05$ .

(B) WT/NarH-FLAG,  $\Delta hcp$ /NarH-FLAG, and WT/NarH C184S-FLAG cells were grown anaerobically on nitrate (N) or fumarate (F) (10 mM, 6 hr). Lysates were analyzed by SNO-RAC (n=3,  $\pm$ SEM). \* differs from nitrate grown WT/NarH-FLAG by ANOVA with Dunnett's test,  $p < 0.05$ .

**Figure S5. Hcp Plays a Role in Protection from Nitrosative Stress, Related to Figure 5**

(A) *E. coli* cultures were started in minimal medium including nitrate (10 mM) at A600 of 0.1. Where indicated sodium nitroprusside (NP; 2 mM) was added and cells were grown anaerobically for 6 hr. SNO levels were measured by  $Hg^{2+}$ -coupled photolysis/chemiluminescence (n=3,  $\pm$ SEM).

(B) *E. coli* cultures were started in minimal medium including 10 mM fumarate or 10 mM nitrate at A600 of 0.2. At various time points, cultures were fixed in 0.5% formaldehyde and A600 was measured (n=3,  $\pm$ SEM). \* p<0.05 WT vs  $\Delta hcp/\Delta norV$ .
